# Supplementary material
Source: MDPI journal article supplement (https://www.mdpi.com/2227-7102/9/3/186)

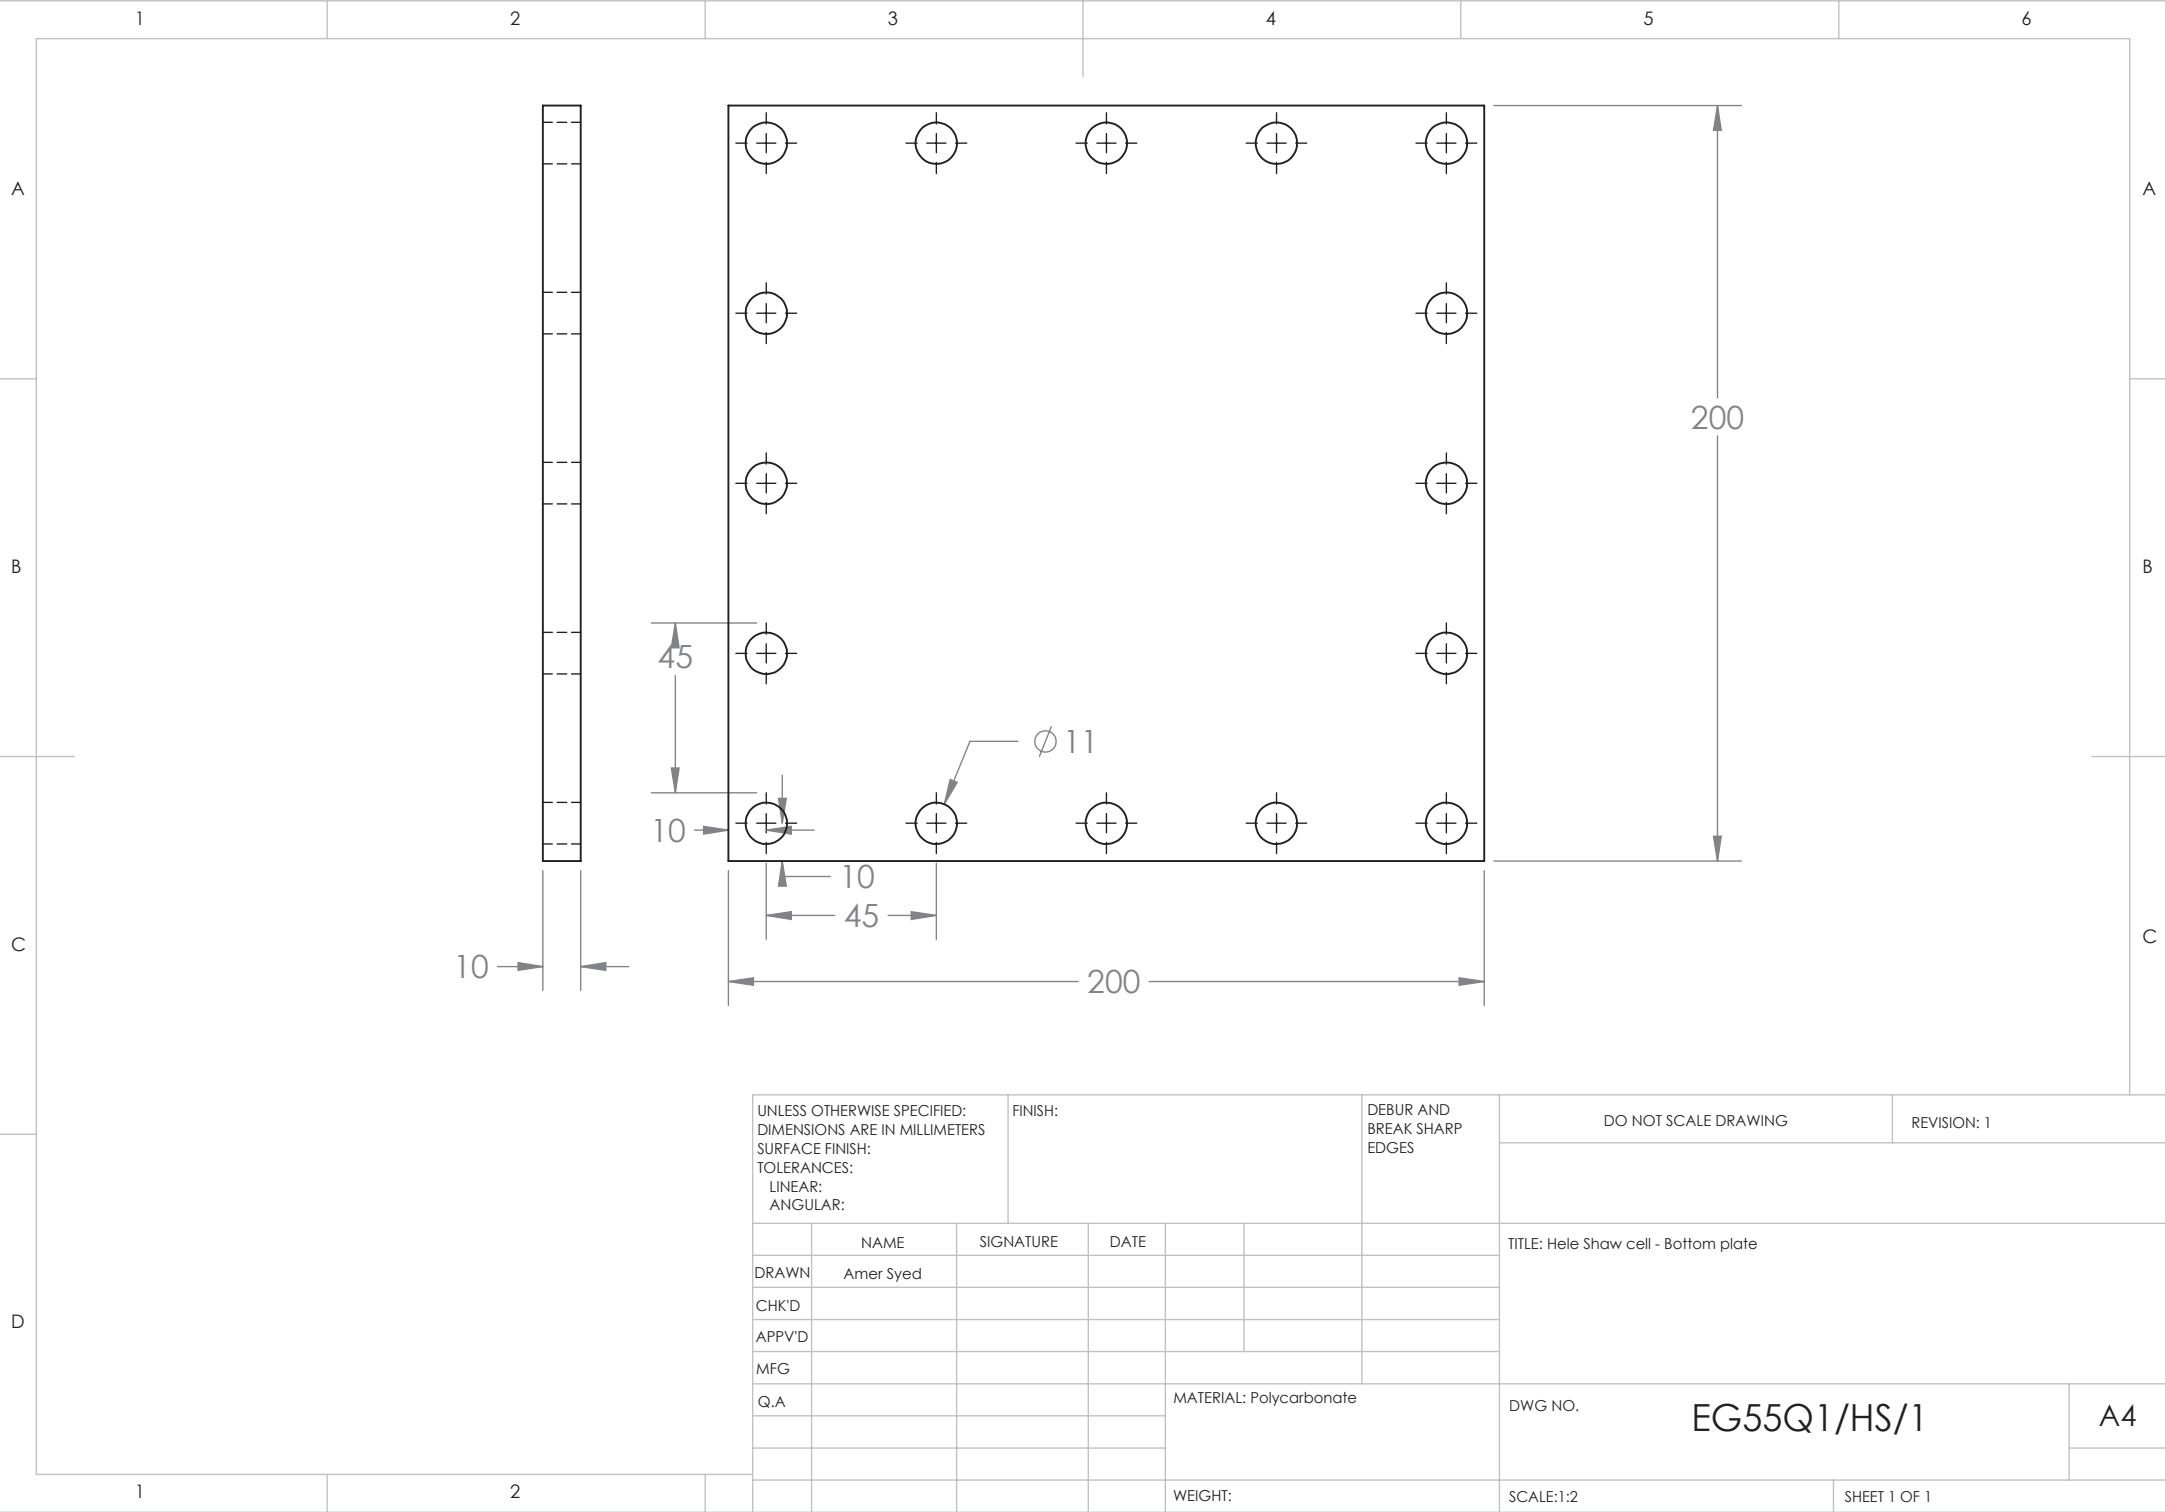



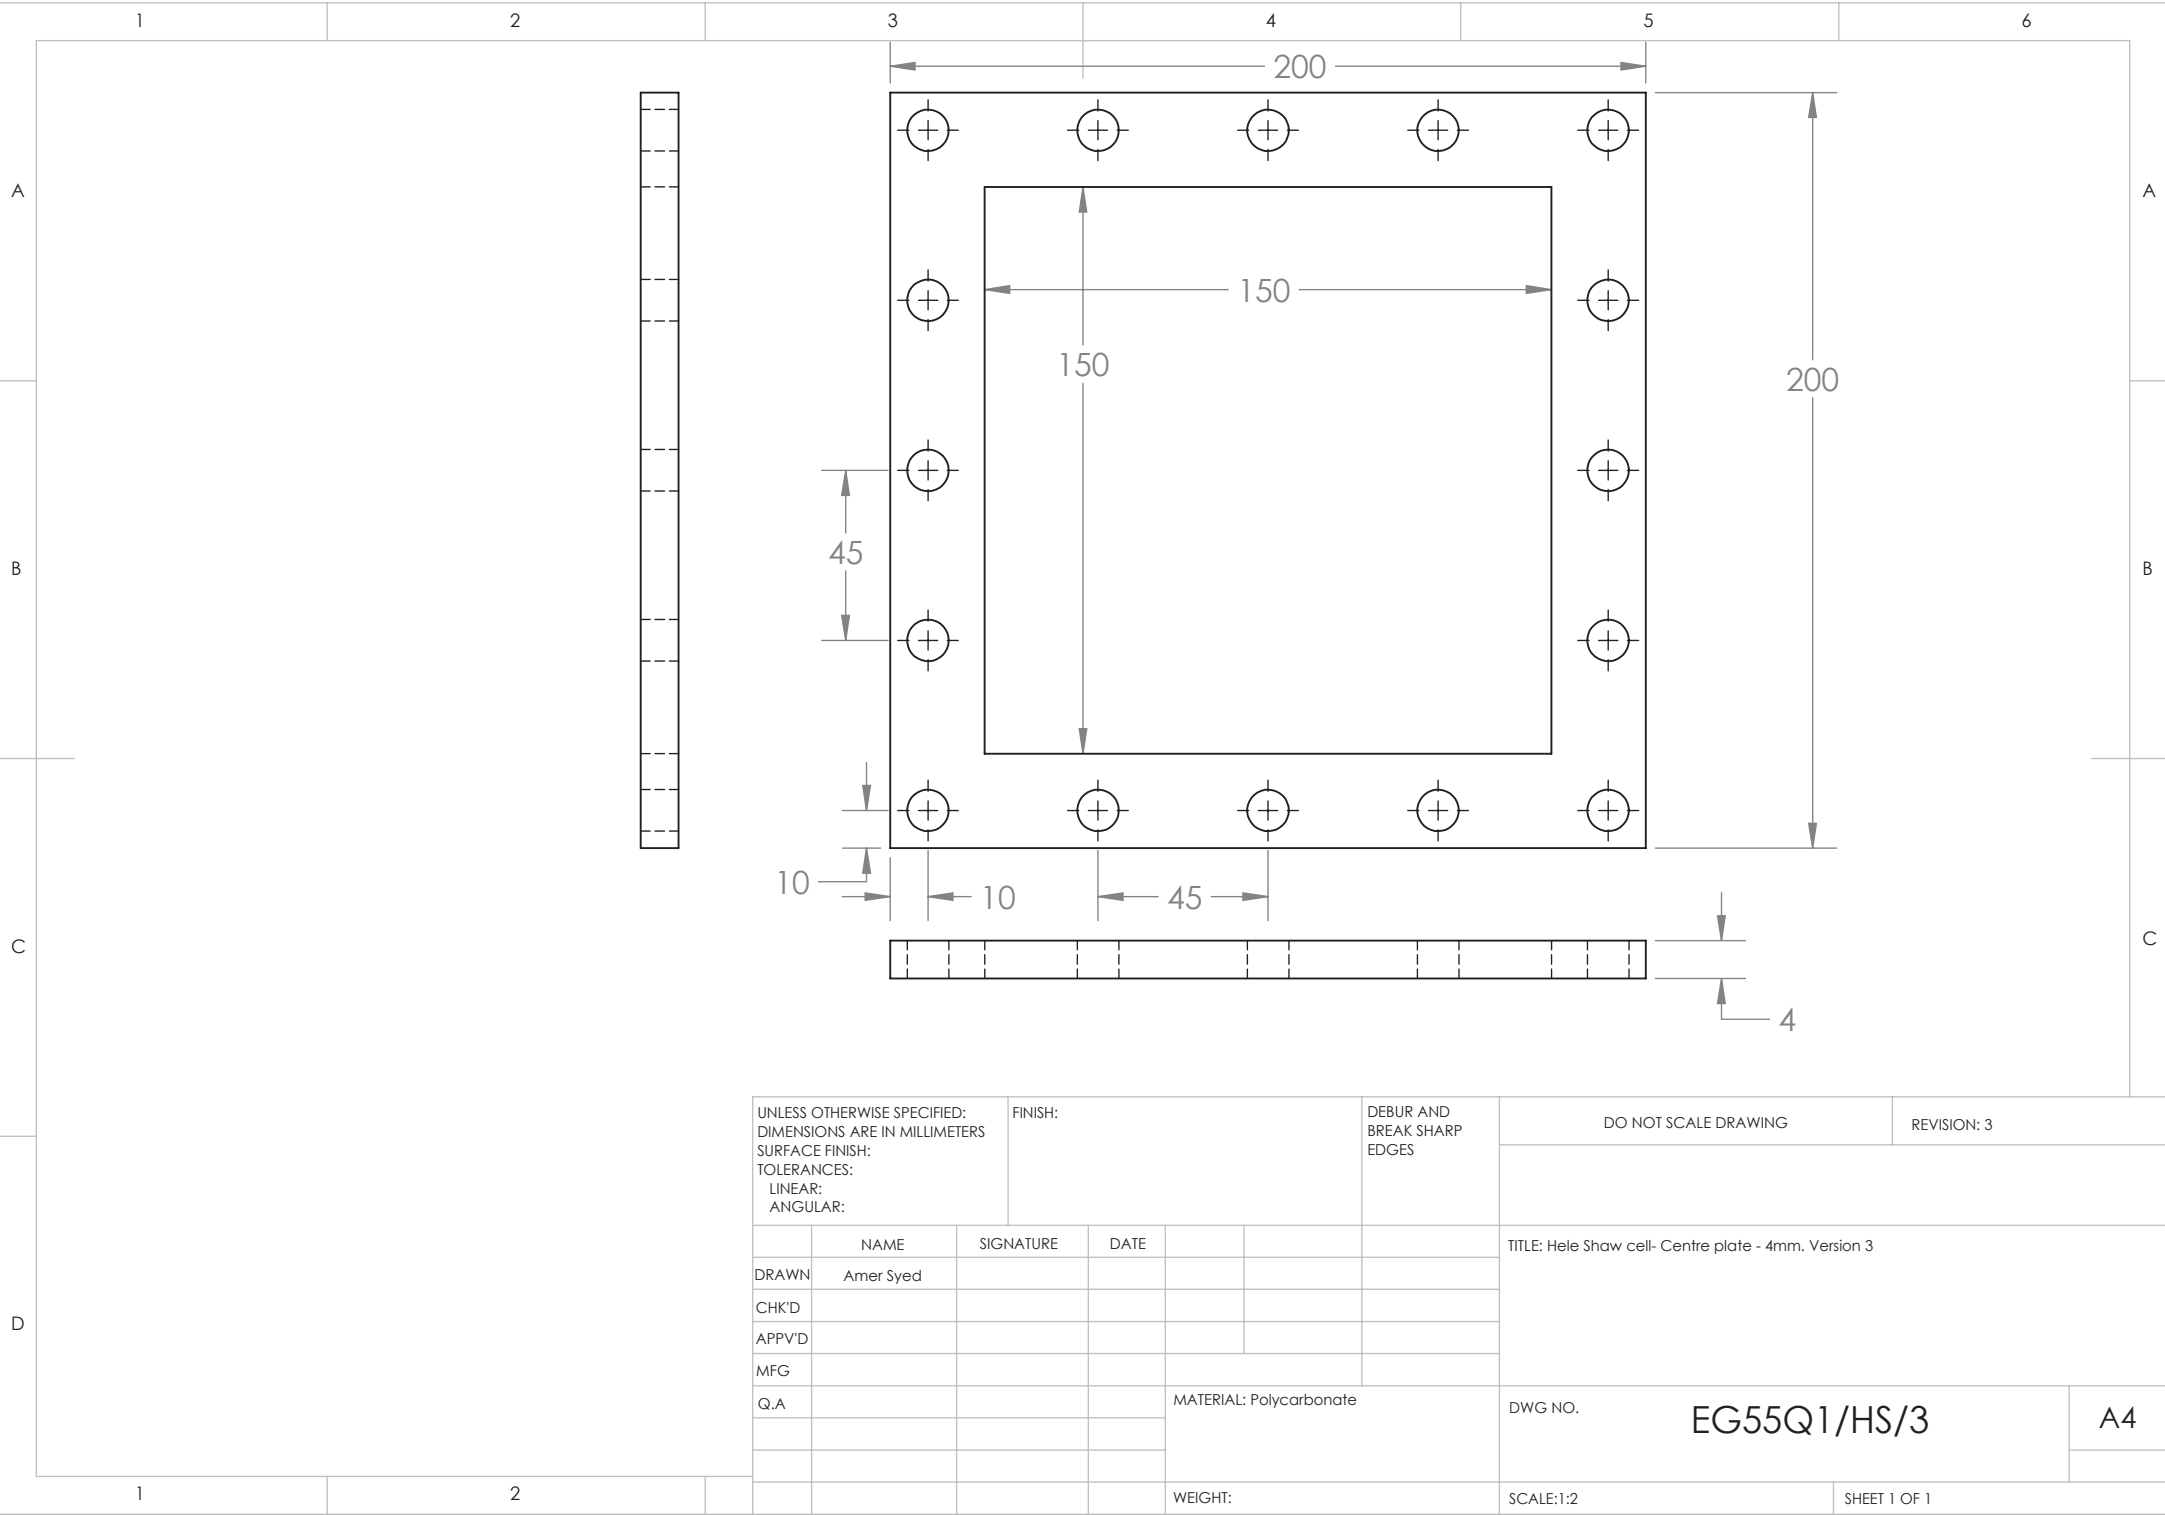

Supplement: s1 [file s1]

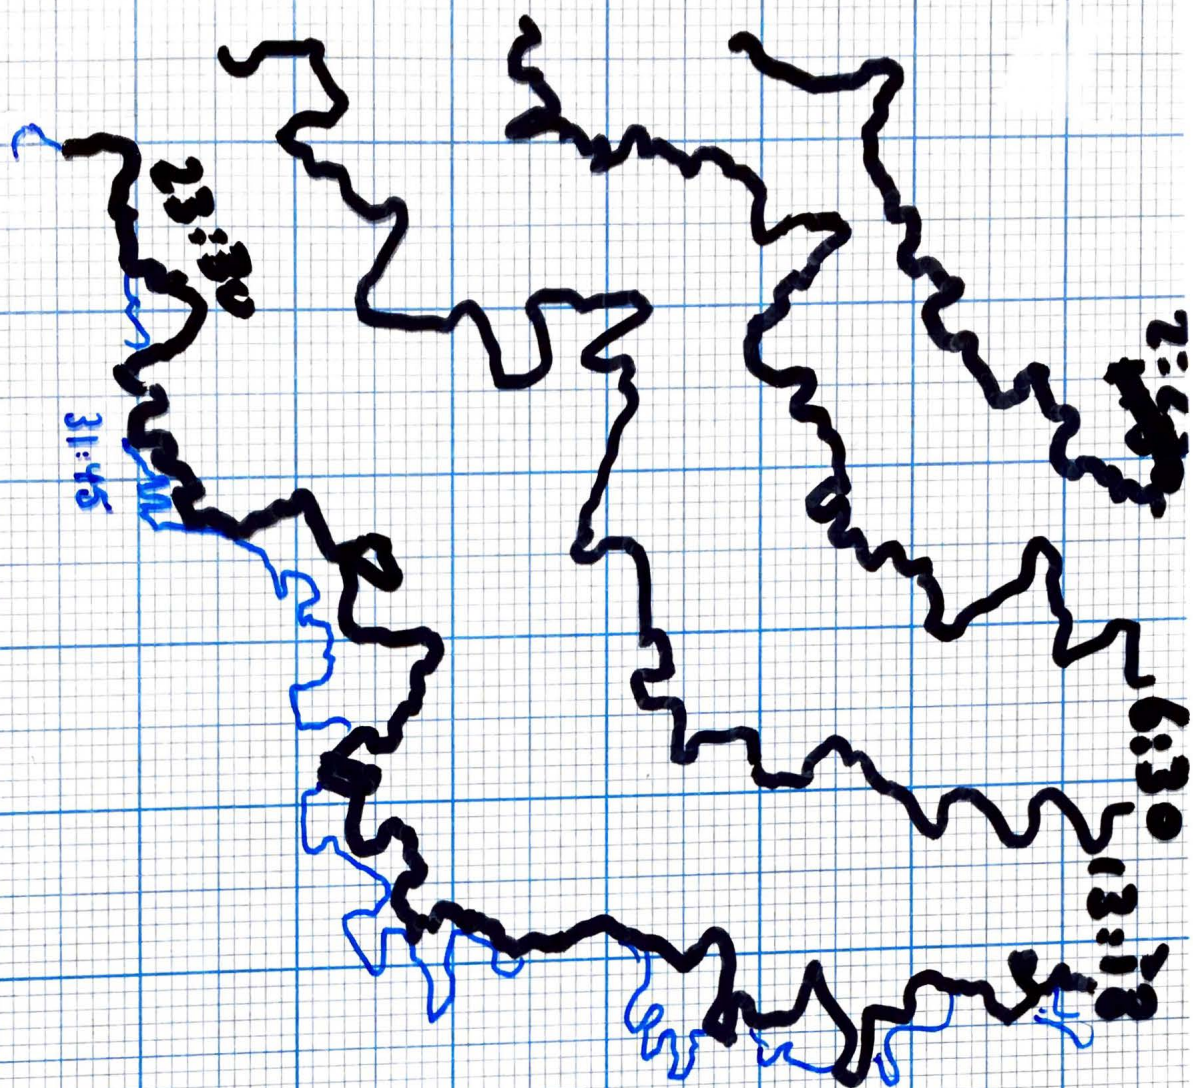

Supplement: s1 [file s1]
